# Supplementary material for: The salt- and drought-inducible poplar GRAS protein SCL7 confers salt and drought tolerance in Arabidopsis thaliana
Source: PubMed Central journal article supplement — J Exp Bot. 2010 Jul 8;61(14):4011–9. doi: 10.1093/jxb/erq217 (PMC2935874; doi:10.1093/jxb/erq217), 2010-07-08
Supplement: supp_erq217_00047035-file001.pdf [file supp_erq217_00047035-file001.pdf]

**Expression profiling and functional characterization of GRAS/SCL gene from *Populus euphratica*.** H Ma, D Liang, P Shuai, X Xia, and W Yin

**SUPPLEMENTARY DATA**

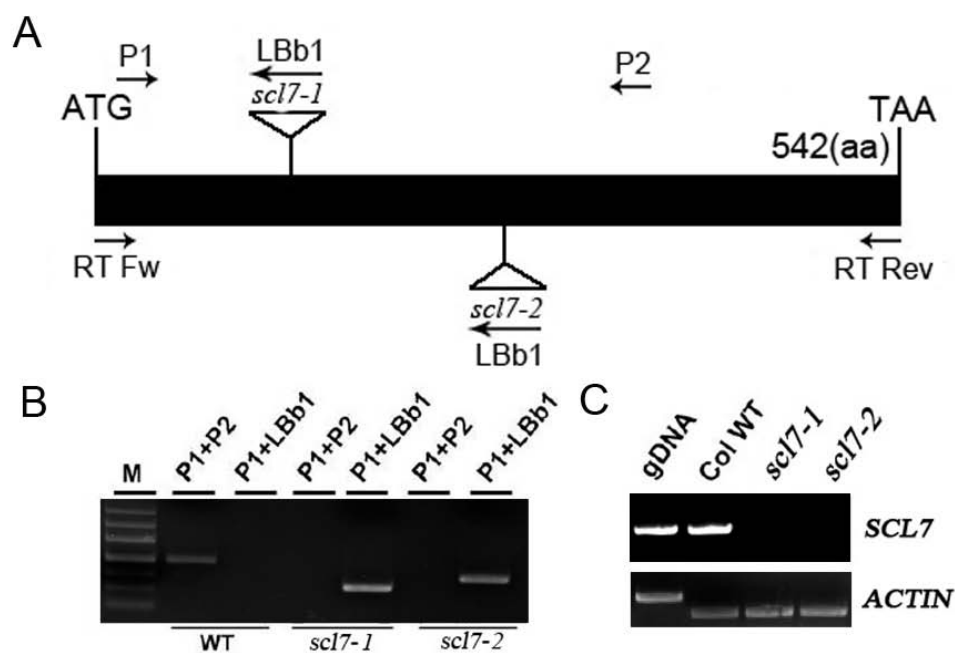

**Fig. S1.** Characterization of the homozygous Salk lines of *AtSCL7* (At3g50650).

- (A) Illustration of the At3g50650 gene structure and location of T-DNA insertions. This gene has no introns. The triangles indicate the positions of the T-DNA insertions in the *scl7-1* (Salk\_ 106909), and *scl7-2* (Salk\_ 106426) alleles (all in the Col-0 background). P1, forward primer; P2, reverse primer; LbB1, primer specific to the T-DNA left border. The RT Fw and RT Rev are primers used for RT-PCR analysis; aa, amino acids.
- (B) Diagnostic PCR of the T-DNA inserted in two different loci of *AtSCL7*. DNA from homozygous insertion lines of *scl7-1* and *scl7-2* were used. M, molecular mass markers. The primers used for PCR are indicated above each lane.
- (C) RT-PCR analysis of the *AtSCL7* transcripts in wild-type and T-DNA insertion mutant seedlings. The primer pairs used for RT-PCR are shown in (A). *ACTIN* was used as an internal control.

**Expression profiling and functional characterization of GRAS/SCL gene from *Populus euphratica*.** H Ma, D Liang, P Shuai, X Xia, and W Yin

Table S1. PCR primers used in this study.

| <i>Primes</i>       | <i>Sequence (5'→3')</i>      |
|---------------------|------------------------------|
| PeRT Fw             | GGAGATCTATGGCATATATGTGTGCAGA |
| PeRT Rev            | GGACTAGTTCGCCATGACGAAACTGTGA |
| <i>PeSCL7</i> -F    | CGAGAATAAAGAGCAATGGAGGG      |
| <i>PeSCL7</i> -R    | ATGACGAAACTGTG AGTAGTGG      |
| Actin-F             | CCTCCAATCCAGACACTGTA         |
| Actin-R             | AACTGGGATGATATGGAGAA         |
| P1                  | GCTTATGGCGTATATGTGCACCGAC    |
| P2                  | CACCTTCCCCTGTTAAGGAAG        |
| LBb1                | GCGTGGACCGCTTGCTGCAACT       |
| RT-Fw               | CCTGTATGGCGTATATGTGCACCGAC   |
| RT-Rev              | TCAACGCCAA GAGGAAACGGT       |
| <i>AMY1</i> -F      | CTTTGGCTTCCTCCTCCTTCTCAA     |
| <i>AMY1</i> -R      | CTTTCCTCTCAGCTGTTCTGTGGT     |
| <i>Cu/Zn SOD</i> -F | ATGGCGAAAGGAGTTGCAGT         |
| <i>Cu/Zn SOD</i> -R | TTAGCCCTGGAGACCAATGA         |
| <i>Tubulin</i> -F   | CGTGGATCACAGCAATACAGAGCC     |
| <i>Tubulin</i> -R   | CCTCCTGCACTTCCACTTCGTCTTC    |
